# Supplementary material
Source: publisher site journal article supplement (https://www.dovepress.com/article/262104)
Supplement: Supplementary file 1 [file get_supplementary_file.php]

**Supplementary data**

**WHO antibiotic prescribing indicators to be evaluated the prescribing pattern**

| **S. No.** | **Type of Indicators** | **Data Source** | **Remark** |
| --- | --- | --- | --- |
| A. | **Hospital Indicators** |  |  |
| 1 | Existence of STGs for infectious diseases | Hospital director’s office &  Pharmacy staffs |  |
| 2 | Existence of an approved hospital FL/EML | Hospital director’s office &  Hospital Pharmacy staffs |  |
| **3** | Availability of a set of key antibiotic in the hospital stores on the day of the study | Hospital pharmacy staffs |  |
| 4 | Average number of days that a set of key antibiotic is out of stock | Hospital pharmacy staffs |  |
| B. | **Prescribing indicators** |  |  |
| 5 | Percentage of hospitalizations with one or more antibiotic prescribed | Medical records |  |
| 6 | Average number of antibiotic prescribed per hospitalization in which antibiotic were prescribed | Medical records |  |
| 7 | Percentage of antibiotic prescribed consistent with the hospital formulary list | Medical records |  |
| 8 | Average duration of prescribed antibiotic treatment | Medical records |  |
| 9 | Percentage of patients who receive surgical antibiotic prophylaxis for cesarean section in accordance with hospital guideline | Medical records |  |
| 10 | Average number of doses of surgical antibiotic prophylaxis prescribed for cesarean section procedures | Medical records |  |
| 11 | Percentage of patients with pneumonia who are prescribed antibiotic in accordance with standard treatment guidelines | Medical records |  |
| C. | **Patient-care & supplemental indicators** |  |  |
| 12 | Percentage of antibiotic prescribed by generic name | Medical records |  |
| 13 | Average duration of hospital stay of patients who received Antibiotic | Medical records |  |
| 14 | Number of antibiotic drug sensitivity tests reported per hospital admission with curative antibiotic prescribed | Clinical history or laboratory or medical records |  |

STGs = Standard treatment guidelines; DTC **=** Drug and therapeutic committee; FL/EML = Formulary list/essential medicines list

**Availability of key antibiotic in the hospital during the study period (54 key antibiotics (**[**35**](#_ENREF_35)**)**

| Sr. No. | Antibiotic | Yes/No | Culture(Yes/No) | Result(S/R) | Isolated MO(s) |
| --- | --- | --- | --- | --- | --- |
|  | Penicillin G |  |  |  |  |
|  | Benzantin Pen |  |  |  |  |
|  | Procain Fortified pencillin |  |  |  |  |
|  | Amoxillin oral |  |  |  |  |
|  | Amoxillin +clavulanic 625mg |  |  |  |  |
|  | Ampicillin 500mg inj/oral |  |  |  |  |
|  | Cloxacillin inj/oral |  |  |  |  |
|  | Cefazolin |  |  |  |  |
|  | Cephalexin |  |  |  |  |
|  | Cefotaxime 1g |  |  |  |  |
|  | Ceftriaxone 1g |  |  |  |  |
|  | Ceftazidime 500mg |  |  |  |  |
|  | Cefuroxime |  |  |  |  |
|  | Cefixime 400mg |  |  |  |  |
|  | Meropenem |  |  |  |  |
|  | Vancomycin 500mg |  |  |  |  |
|  | Clindamycin |  |  |  |  |
|  | Clarithromycin 250mg |  |  |  |  |
|  | Azithromycin |  |  |  |  |
|  | Erythromycin |  |  |  |  |
|  | Chloramphenicol 500mg |  |  |  |  |
|  | Doxycycline 100mg |  |  |  |  |
|  | Tetracycline |  |  |  |  |
|  | Metronidazole 500mg/100ml |  |  |  |  |
|  | Co-trimoxazole |  |  |  |  |
|  | Ciprofloxacin 500mg |  |  |  |  |
|  | Norfloxacin |  |  |  |  |
|  | Gentamycin 80mg/2ml |  |  |  |  |
| 29-54 | Neomycin |  |  |  |  |

S. Susceptible; R. resistant; Mo. microorganism

MRN=____________________________________Ward_________________________

1. How many patients (M/F, age) admitted to the ward within the last six months:__________
2. Male
3. Female
4. Age (Years)____________________
5. Residence: A. Rural B. Urban
6. For how long s/he was hospitalized (days), hospital stay:____________________________
7. Was he/she on at least one Antibiotic? 1. Yes 2. No

Of them how many patients had been on at least one antibiotic=______________________

1. If “Yes”, prescribed antibiotics (name, route, dose, frequency, duration and indication) :

| No | Name | Dose | Route | Frequency | duration | Indication /Dx |
| --- | --- | --- | --- | --- | --- | --- |
| 1 |  |  |  |  |  |  |
| 2 |  |  |  |  |  |  |
| 3 |  |  |  |  |  |  |
| 4 |  |  |  |  |  |  |

1. Total number of antibiotics prescribed within the given period:_______________________
2. Average number of prescribed antibiotics per patient:______________________________
3. Were the antibiotics prescribed in accordance of STG? 1. Yes 2. No

How many antibiotics were prescribed according to the STG or other guideline:__________

1. Was prescribed by generic name? 1. Yes 2. No

How many antibiotics were prescribed by generic name:_____________________________

1. Was prescribed from FML/EDL? 1. Yes 2. No

How many antibiotics were prescribed from FML/EDL:__________________________________

1. List of key antibiotics available in the hospital continuously within the study period:______
2. List of key antibiotics not available (stock out) in the hospital within the study period:_____

For how many days stock out from the hospital (stock out days):_____________________

1. Percentage of antibiotics prescribed per patient was calculated to measure the degree of polypharmacy. It was calculated by dividing the total number of antibiotics prescribed by the number of patients involved.
2. Percentage of antibiotics prescribed by generic name is calculated to measure the tendency of prescribing by generic name. It was calculated by dividing the number of antibiotics prescribed by generic name by total number of antibiotics prescribed, multiplied by 100.
3. Percentage of patients in which an antibiotic was prescribed was calculated to measure the overall use of commonly over used of antibiotics therapy. It was calculated by dividing the number of patients in which an antibiotic was prescribed by the total number of patients included, multiplied by 100.
4. Percentage of patients with an injection prescribed was calculated to measure the overall level use of commonly over used of antibiotics in injection form. It was calculated by dividing the number of patient patients in which injectable antibiotics were prescribed by the total number of cohorts included, multiplied by 100.
5. Percentage of antibiotics prescribed from an Essential Drug List (EDL) was calculated to measure the degree to which practices conform to a national drug policy as indicated in the national drug list of Ethiopia. It was calculated by dividing number of antibiotics prescribed which are in essential drug list by the total number of antibiotics prescribed, multiplied by 100. Details regarding the formula for calculation are summarized in the next page.

## Formulas used to calculate the indicators

- 1. **Prescribing indicators**
  2. **Hospital indicators**
  3. **Patient care indicator**
